# Supplementary material for: Spatially ordered NiOOH-ZnS/CdS heterostructures with an efficient photo-carrier transmission channel for markedly improved H2 production
Source: Royal Society of Chemistry journal article supplement (doi:10.1039/d4dt00185k), 2024-01-01
Supplement: d4dt00185k1.pdf [file d4dt00185k1.pdf]

## Supplementary Information

### Spatially ordered NiOOH-ZnS/CdS heterostructures with efficient photo-carriers transmission channel for markedly-improved H<sub>2</sub> production

Xinxin Xin,<sup>a</sup> Yuanxin Qiu,<sup>a</sup> Chuan Jiang,<sup>a</sup> Yanyan Li,<sup>\*a</sup> Hui Wang,<sup>a,b</sup> Jixiang Xu,<sup>a</sup> Haifeng Lin,<sup>\*a</sup> Lei Wang<sup>a</sup> and Volodymyr Turkevych<sup>c</sup>

<sup>a</sup> Key Laboratory of Eco-chemical Engineering, International S&T Cooperation Foundation of Eco-chemical Engineering and Green Manufacture, College of Chemistry and Molecular Engineering, Qingdao University of Science and Technology, Qingdao 266042, P. R. China

<sup>b</sup> Shandong Provincial Key Laboratory of Olefin Catalysis and Polymerization, Key Laboratory of Rubber-Plastics of Ministry of Education, School of Polymer Science and Engineering, Qingdao University of Science and Technology, Qingdao 266042, P. R. China

<sup>c</sup> V. Bakul Institute for Superhard Materials, National Academy of Sciences of Ukraine, Kyiv 04074, Ukraine

\* Corresponding author. E-mail address: liyanyan6771@163.com (Y. Li), hflin20088@126.com (H. Lin).

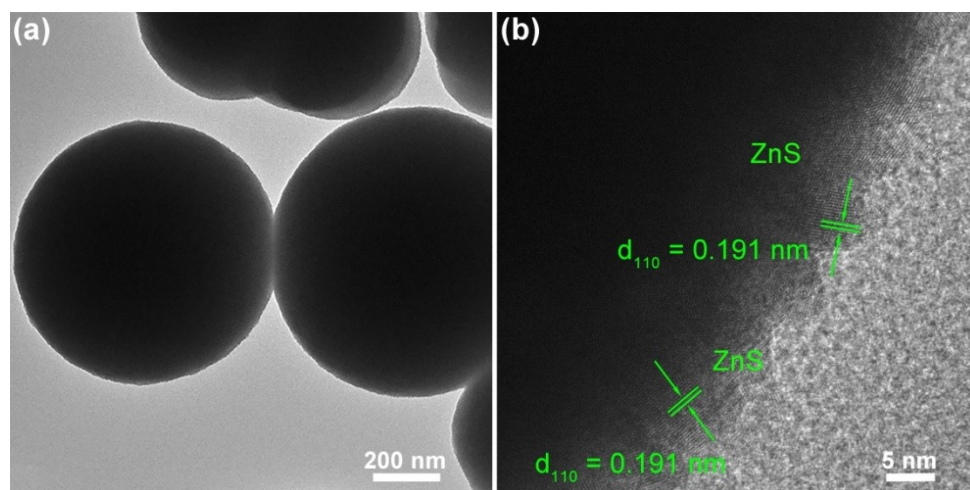

Fig. S1. (a) TEM and (b) HRTEM images of ZnS sample.

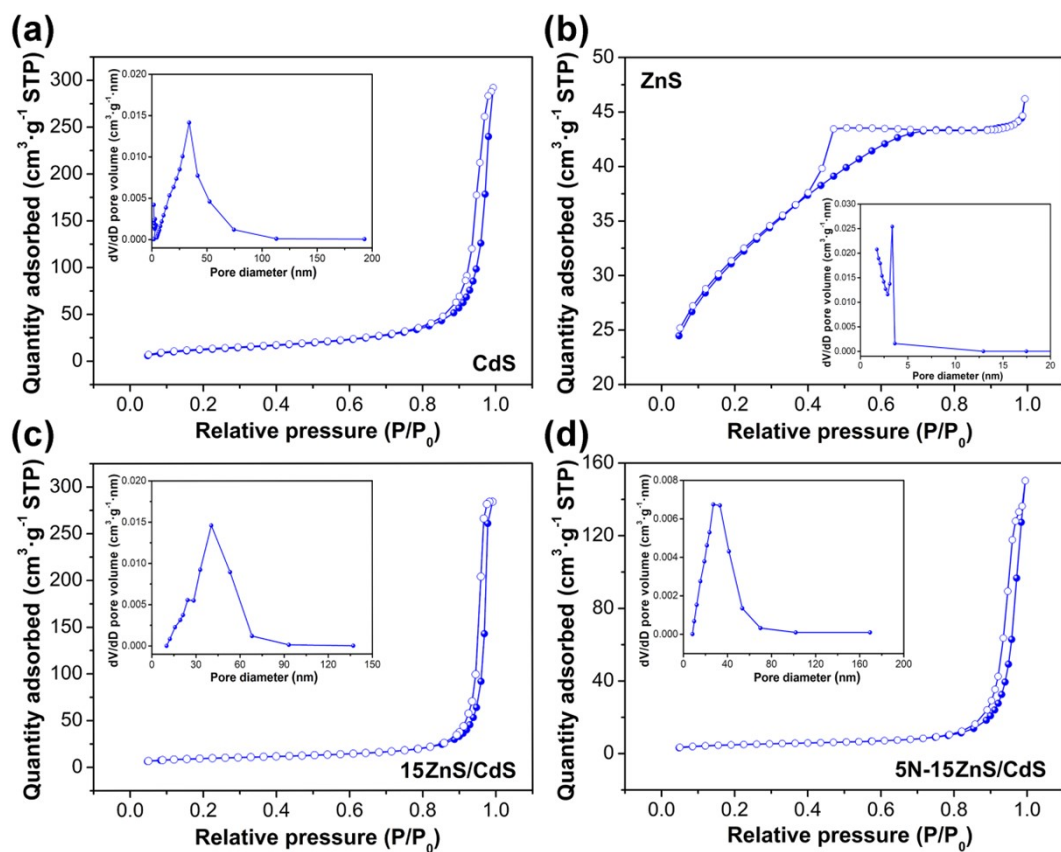

Fig. S2.  $N_2$  adsorption-desorption isotherms and pore-size distributions of (a) CdS, (b) ZnS, (c) 15ZnS/CdS, and (d) 5N-15ZnS/CdS.

Table S1. Specific surface areas of different samples.

| Sample                           | CdS  | ZnS   | 15ZnS/CdS | 5N-15ZnS/CdS |
|----------------------------------|------|-------|-----------|--------------|
| $S_{BET}$ ( $m^2 \cdot g^{-1}$ ) | 48.3 | 106.0 | 32.3      | 17.1         |

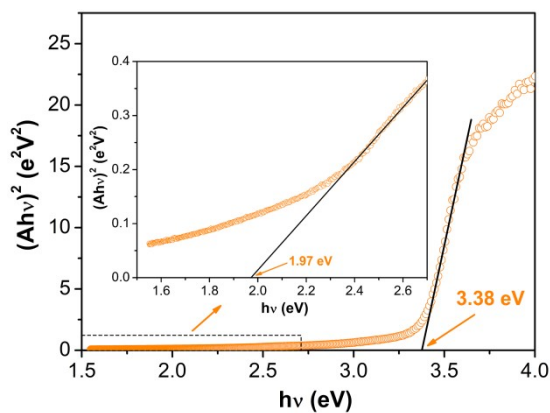

Fig. S3. Tauc plot of ZnS. Inset displays the bandgap relevant to zinc vacancies.

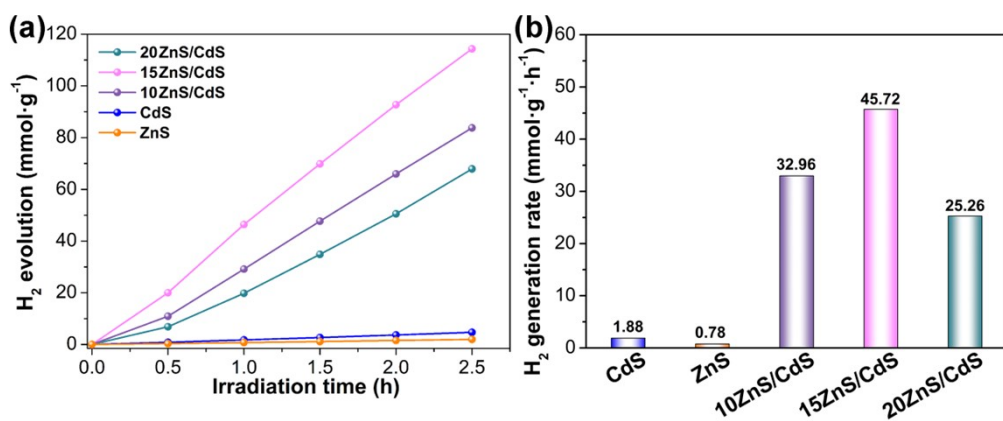

Fig. S4. (a) Photocatalytic H<sub>2</sub> generation activities and (b) average rates of different samples.

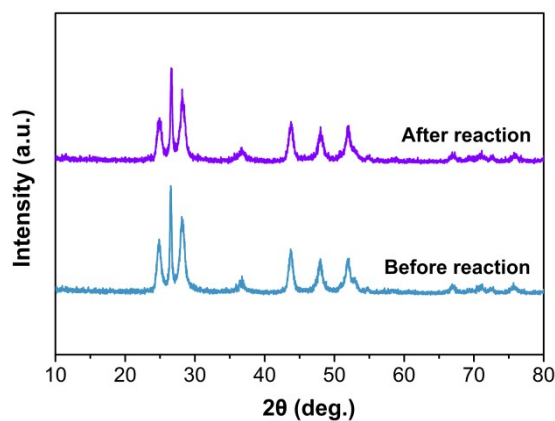

Fig. S5. XRD patterns of 5N-15ZnS/CdS before and after cyclic HER test.

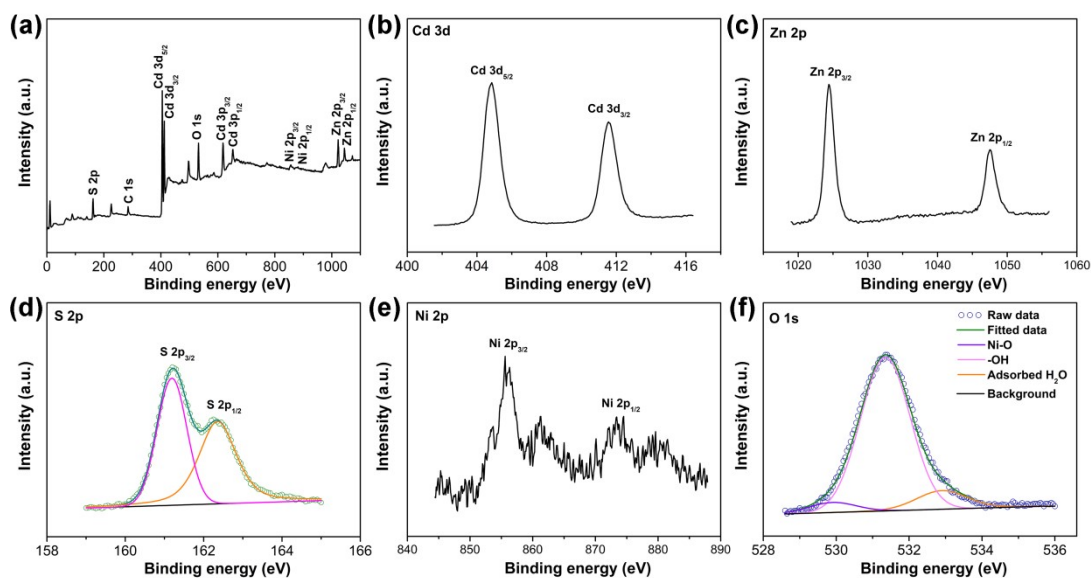

Fig. S6. (a) XPS survey and high-resolution (b) Cd 3d, (c) Zn 2p, (d) S 2p, (e) Ni 2p, and (f) O 1s XPS spectra of 5N-15ZnS/CdS after cyclic photocatalytic reaction.

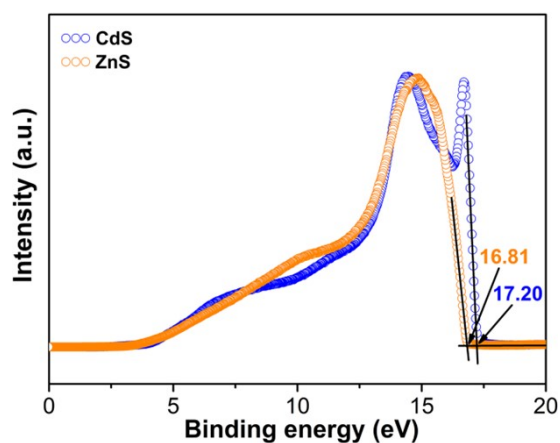

Fig. S7. UPS spectra of CdS and ZnS.

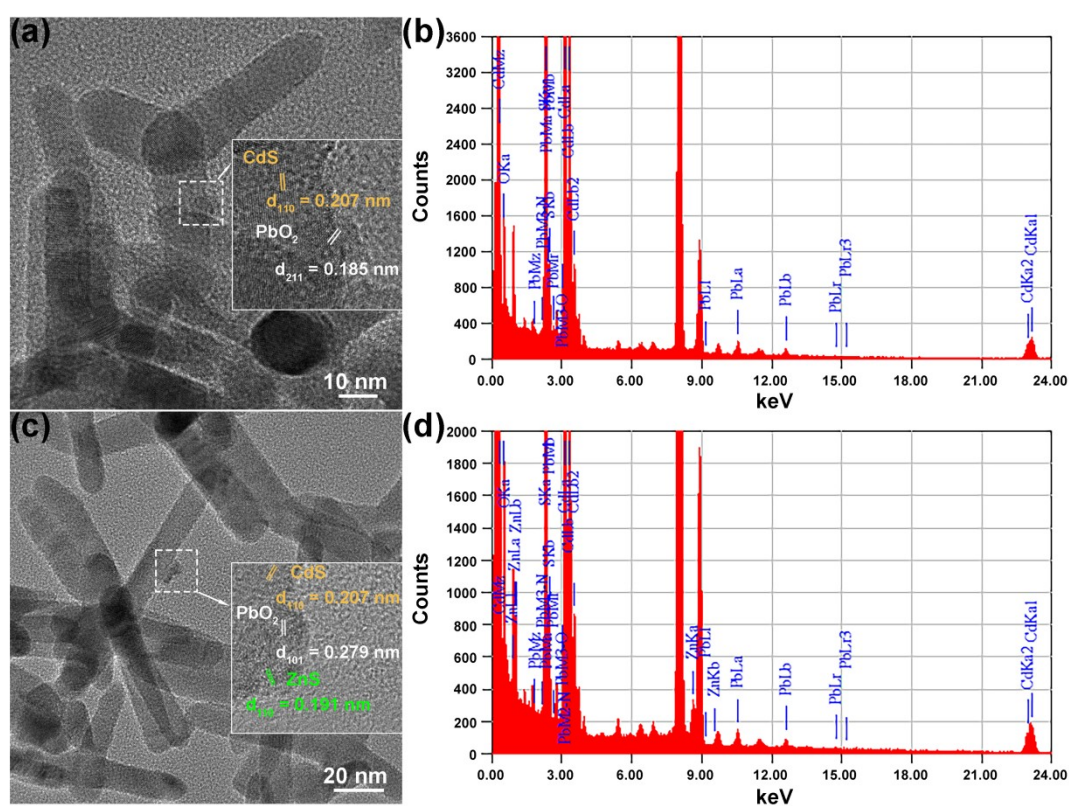

Fig. S8. (a, c) TEM, HRTEM (insets) and (b, d) EDX results of (a, b) CdS and (c, d) 15ZnS/CdS.

Table S2. Comparison on the HER activities of CdS-based photocatalysts.

| Photocatalyst                       | Hole scavenger<br>(aqueous solution)              | Light source<br>(Xe lamp) | Maximum rate<br>(mmol·h <sup>-1</sup> ·g <sup>-1</sup> ) | AQY (420 nm)            | Reference |
|-------------------------------------|---------------------------------------------------|---------------------------|----------------------------------------------------------|-------------------------|-----------|
| 5N-15ZnS/CdS                        | Na <sub>2</sub> S/Na <sub>2</sub> SO <sub>3</sub> | λ > 420 nm                | 152.20                                                   | 40.9%<br>32.2% (400 nm) | This work |
| CdS/MoS <sub>2</sub> /Mo            | Na <sub>2</sub> S/Na <sub>2</sub> SO <sub>3</sub> | λ > 420 nm                | 4.54                                                     | 11.03%                  | 1         |
| Ag <sub>2</sub> S@CdS/ZnS           | Na <sub>2</sub> S/Na <sub>2</sub> SO <sub>3</sub> | λ > 420 nm                | 3.76                                                     | 6.83% (365 nm)          | 2         |
| Co <sub>3</sub> O <sub>4</sub> /CdS | TEOA                                              | λ > 420 nm                | 16.32                                                    | 32.21%                  | 3         |

|                                                                       |                                                   |                    |       |                |    |
|-----------------------------------------------------------------------|---------------------------------------------------|--------------------|-------|----------------|----|
| <b>MoSe<sub>2</sub>/CdS-CdSe</b>                                      | Lactic acid                                       | $\lambda > 420$ nm | 24.34 | 28.5% (500 nm) | 4  |
| <b>ZnIn<sub>2</sub>S<sub>4</sub>/CdS</b>                              | Na <sub>2</sub> S/Na <sub>2</sub> SO <sub>3</sub> | $\lambda > 420$ nm | 7.4   | 12.6%          | 5  |
| <b>TP/TAP/CdS</b>                                                     | Ascorbic acid                                     | $\lambda > 420$ nm | 47.6  | 25.23%         | 6  |
| <b>CdS/Nb<sub>2</sub>C</b>                                            | Na <sub>2</sub> S/Na <sub>2</sub> SO <sub>3</sub> | $\lambda > 420$ nm | 2.53  | 3.69%          | 7  |
| <b>CdS@NiB</b>                                                        | TEOA                                              | $\lambda > 420$ nm | 28.11 | 16.45%         | 8  |
| <b>CdS/PT</b>                                                         | Lactic acid                                       | $\lambda > 420$ nm | 9.28  | 24.3%          | 9  |
| <b>NiO/CdS</b>                                                        | Na <sub>2</sub> S/Na <sub>2</sub> SO <sub>3</sub> | $\lambda > 420$ nm | 15.6  | 16%            | 10 |
| <b>WN/CdS</b>                                                         | Lactic acid                                       | $\lambda > 420$ nm | 24.13 | 18.59%         | 11 |
| <b>MoSe<sub>2</sub>/CdS</b>                                           | Lactic acid                                       | $\lambda > 420$ nm | 4.7   | 15.6% (450 nm) | 12 |
| <b>CdS/Cu<sub>7</sub>S<sub>4</sub>/g-C<sub>3</sub>N<sub>4</sub></b>   | Na <sub>2</sub> S/Na <sub>2</sub> SO <sub>3</sub> | $\lambda > 420$ nm | 3.57  | 4.4%           | 13 |
| <b>CeO<sub>2-x</sub>S<sub>x</sub>@CdS</b>                             | Na <sub>2</sub> S/Na <sub>2</sub> SO <sub>3</sub> | $\lambda > 420$ nm | 1.15  | -              | 14 |
| <b>CdS/MoO<sub>2</sub>/MoS<sub>2</sub></b>                            | Lactic acid                                       | 400–800 nm         | 1.25  | 11.3%          | 15 |
| <b>CdS@Au/MXene</b>                                                   | Lactic acid                                       | $\lambda > 420$ nm | 5.37  | 16.7%          | 16 |
| <b>B-g-C<sub>3</sub>N<sub>x</sub>/Bi<sub>2</sub>S<sub>3</sub>/CdS</b> | Methanol                                          | $\lambda > 420$ nm | 4.78  | -              | 17 |
| <b>CdS@TPPA</b>                                                       | Sodium ascorbate                                  | $\lambda > 420$ nm | 24.3  | 4.29%          | 18 |
| <b>CdS–NiFeS</b>                                                      | Na <sub>2</sub> S/Na <sub>2</sub> SO <sub>3</sub> | 320–780 nm         | 62.67 | 22.1% (380 nm) | 19 |
| <b>MOF/CdS</b>                                                        | Benzyl alcohol                                    | $\lambda > 350$ nm | 0.63  | 1.45%          | 20 |
| <b>SAO/CdS</b>                                                        | Na <sub>2</sub> S/Na <sub>2</sub> SO <sub>3</sub> | $\lambda > 420$ nm | 1.21  | 30.1%          | 21 |
| <b>CdS/VC</b>                                                         | Lactic acid                                       | $\lambda > 420$ nm | 14.2  | 8.7%           | 22 |
| <b>CdS-CTF-1</b>                                                      | Lactic acid                                       | $\lambda > 420$ nm | 11.43 | 16.3%          | 23 |
| <b>CdS/MoC</b>                                                        | Lactic acid                                       | $\lambda > 420$ nm | 56.13 | 7.6%           | 24 |
| <b>Zr-MOF/CdS</b>                                                     | Lactic acid                                       | $\lambda > 420$ nm | 1.86  | -              | 25 |
| <b>Ca-modified CoP<sub>x</sub>@CdS</b>                                | Na <sub>2</sub> S/Na <sub>2</sub> SO <sub>3</sub> | $\lambda > 420$ nm | 24.42 | 35.4%          | 26 |
| <b>P-CdS/Ni-MOL</b>                                                   | Lactic acid                                       | $\lambda > 420$ nm | 29.81 | 4.78% (450 nm) | 27 |
| <b>CdS/Cu<sub>7</sub>S<sub>4</sub></b>                                | Na <sub>2</sub> S/Na <sub>2</sub> SO <sub>3</sub> | $\lambda > 420$ nm | 27.8  | 14.7%          | 28 |
| <b>MnO<sub>2</sub>@CdS</b>                                            | Na <sub>2</sub> S/Na <sub>2</sub> SO <sub>3</sub> | $\lambda > 420$ nm | 3.94  | 16.9% (450 nm) | 29 |
| <b>CdS/ZnS</b>                                                        | Na <sub>2</sub> S/Na <sub>2</sub> SO <sub>3</sub> | $\lambda > 400$ nm | 14.02 | 2.76% (400 nm) | 30 |

**Table S3.** Fitting parameters for the TRPL spectra of different samples.

| Sample     | $\tau_1$ (ns) | Ref <sub>1</sub> (%) | $\tau_2$ (ns) | Ref <sub>2</sub> (%) | $\tau_{avg}$ (ns) |
|------------|---------------|----------------------|---------------|----------------------|-------------------|
| <b>CdS</b> | 0.63          | 37.3                 | 4.19          | 62.7                 | 1.92              |
| <b>ZnS</b> | 4.18          | 38.4                 | 9.33          | 61.6                 | 7.35              |

|                     |      |      |      |      |      |
|---------------------|------|------|------|------|------|
| <b>15ZnS/CdS</b>    | 0.38 | 46.5 | 2.25 | 53.5 | 1.08 |
| <b>5N-15ZnS/CdS</b> | 0.29 | 52.8 | 1.50 | 47.2 | 0.86 |

## References

- 1 L. Zhao, J. Jia, Z. Yang, J. Yu, A. Wang, Y. Sang, W. Zhou and H. Liu, *Appl. Catal. B-Environ.*, 2017, **210**, 290-296.
- 2 F. Zhao, Y. L. Law, N. Zhang, X. Wang, W. Wu, Z. Luo and Y. Wang, *Small*, 2023, **19**, 2208266.
- 3 C. Zhang, B. Liu, W. Li, X. Liu, K. Wang, Y. Deng, Z. Guo and Z. Lv, *J. Mater. Chem. A*, 2021, **9**, 11665-11673.
- 4 Y. Liu, Y. Li, Y. Lin, S. Yang, Q. Zhang and F. Peng, *Chem. Eng. J.*, 2020, **383**, 123133.
- 5 C. Q. Li, X. Du, S. Jiang, Y. Liu, Z. L. Niu, Z. Y. Liu, S. S. Yi and X. Z. Yue, *Adv. Sci.*, 2022, **9**, 2201773.
- 6 R. Gao, J. Bai, R. Shen, L. Hao, C. Huang, L. Wang, G. Liang, P. Zhang and X. Li, *J. Mater. Sci. Technol.*, 2023, **137**, 223-231.
- 7 M. Tayyab, U. E. Kulsoom, Y. Liu, S. Mansoor, M. Khan, Z. Akmal, A. Mushtaq, M. Arif, U. Shamriaz, L. Zhou, J. Lei and J. Zhang, *Int. J. Hydrogen Energy*, 2024, **51**, 1400-1413.
- 8 Z. Lv, Y. Wang, Y. Liu, J. Wang, G. Qin, Z. Guo and C. Zhang, *J. Phys. Chem. C*, 2022, **126**, 9041-9050.
- 9 C. Cheng, B. He, J. Fan, B. Cheng, S. Cao and J. Yu, *Adv. Mater.*, 2021, **33**, 13877-13889.
- 10 P. Wang, X. Huang, T. Dong, Y. Ren and J. Hu, *Appl. Surf. Sci.*, 2022, **606**, 154940.
- 11 H. Liu, J. Chen, W. Guo, Q. Xu and Y. Min, *J. Colloid Interface Sci.*, 2022, **613**, 652-660.
- 12 X. Yang, W. Liu, C. Han, C. Zhao, H. Tang, Q. Liu and J. Xu, *Mater. Today Phys.*, 2020, **15**, 100261.
- 13 J. Chu, X. Han, Z. Yu, Y. Du, B. Song and P. Xu, *ACS Appl. Mater. Interfaces*, 2018, **10**, 20404-20411.
- 14 N.-C. Zheng, T. Ouyang, Y. Chen, Z. Wang, D.-Y. Chen and Z.-Q. Liu, *Catal. Sci. Technol.*, 2019, **9**, 1357-1364.
- 15 C. Bie, B. Zhu, L. Wang, H. Yu, C. Jiang, T. Chen and J. Yu, *Angew. Chem. Int. Ed.*, 2022, **61**, 2212045.
- 16 Z. Li, W. Huang, J. Liu, K. Lv and Q. Li, *ACS Catal.*, 2021, **11**, 8510-8520.
- 17 Y. Xiao, M. Li, H. Li, Z. Wang and Y. Wang, *Nano Energy*, 2024, **120**, 109164.
- 18 Y. Chen, D. Yang, Y. Gao, R. Li, K. An, W. Wang, Z. Zhao, X. Xin, H. Ren and Z. Jiang, *Research*, 2021, **2021**, 9798564.
- 19 G. Sun, Z. Tai, F. Li, Q. Ye, T. Wang, Z. Fang, X. Hou, L. Jia and H. Wang, *ACS Sustain. Chem. Eng.*, 2023, **11**, 4009-4019.
- 20 B. Liu, J. Cai, J. Zhang, H. Tan, B. Cheng and J. Xu, *Chin. J. Catal.*, 2023, **51**, 204-215.
- 21 T. Wang, L. Xu, J. Cui, J. Wu, Z. Li, Y. Wu, B. Tian and Y. Tian, *Nano Lett.*, 2022, **22**, 6664-6670.
- 22 L. Tian, S. Min and F. Wang, *Appl. Catal. B-Environ.*, 2019, **259**, 118029.
- 23 D. Wang, H. Zeng, X. Xiong, M.-F. Wu, M. Xia, M. Xie, J.-P. Zou and S.-L. Luo, *Sci. Bull.*, 2020, **65**, 113-122.
- 24 Y. Lei, X. Wu, S. Li, J. Huang, K. H. Ng and Y. Lai, *J. Clean. Prod.*, 2021, **322**, 129018.
- 25 H. Hu, K. Zhang, G. Yan, L. Shi, B. Jia, H. Huang, Y. Zhang, X. Sun and T. Ma, *Chin. J. Catal.*,

2022, **43**, 2332-2341.

- 26 X. Ren, F. Liu, Q. Wang, H. Song, S. Luo, S. Li, G. Yang, B. Deng, Z. Huang, X.-S. Wang, L. Shi and J. Ye, *Appl. Catal. B-Environ.*, 2022, **303**, 120887.
- 27 W. Yang, M. Xu, K. Y. Tao, J. H. Zhang, D. C. Zhong and T. B. Lu, *Small*, 2022, **18**, 2200332.
- 28 D. Ren, R. Shen, Z. Jiang, X. Lu, X. Li, *Chin. J. Catal.*, 2020, **41**, 31-40.
- 29 S. Zulfiqar, S. Liu, N. Rahman, H. Tang, S. Shah, X.-H. Yu and Q.-Q. Liu, *Rare Met.*, 2021, **40**, 2381-2391.
- 30 D. Zhang, J. Teng, H. Yang, Z. Fang, K. Song, L. Wang, H. Hou, X. Lu, C. R. Bowen and W. Yang, *Carbon Energy*, 2022, **5**, 2381-2391.
